# Supplementary material
Source: Springer Nature journal article supplement (https://www.springermedizin.de/resource/supplementary/12974_2011_426_MOESM5_ESM.pdf/9601240)

## Frontal Lobe

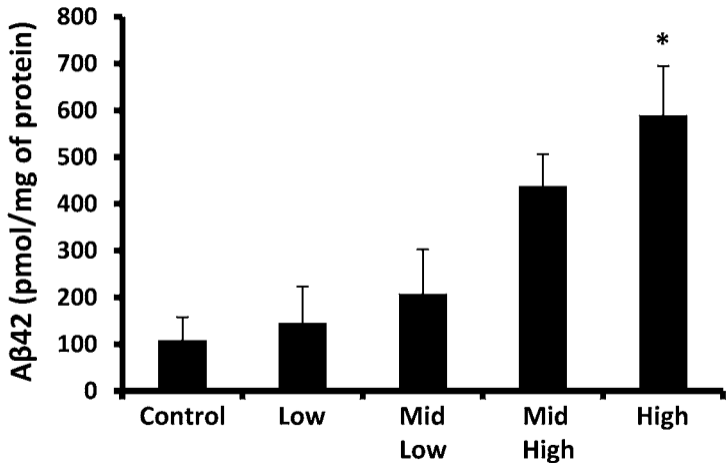

Supplement: MOESM5 [file 9601240]
